# Supplementary material for: KIF1Bβ increases ROS to mediate apoptosis and reinforces its protein expression through O2− in a positive feedback mechanism in neuroblastoma
Source: PubMed Central journal article supplement (PMC5715000; doi:10.1038/s41598-017-17192-6), 2017-12-04

**KIF1B $\beta$  increases ROS to mediate apoptosis and reinforces its protein expression  
through O<sub>2</sub><sup>-</sup> in a positive feedback mechanism in neuroblastoma**

Clara Angelina<sup>1#</sup>, Irene Sze Ying Tan<sup>1#</sup>, Zhang'e Choo<sup>1</sup>, Oswald Zhao Jian Lee<sup>1</sup>, Shazib  
Pervaiz<sup>1,2,3,4</sup>, Zhi Xiong Chen<sup>1,5\*</sup>

<sup>1</sup>Department of Physiology, Yong Loo Lin School of Medicine, National University of  
Singapore, Singapore (I.S.Y.T., C.A., O.Z.J.L., Z.C., S.P., Z.X.C.)

<sup>2</sup>NUS Graduate School for Integrative Sciences and Engineering, National University of  
Singapore, Singapore (S.P.)

<sup>3</sup>Cancer and Stem Cell Biology Program, Duke-NUS Graduate Medical School, Singapore  
(S.P.)

<sup>4</sup>Singapore-MIT Alliance, Singapore (S.P.)

<sup>5</sup>KK Women's and Children's Hospital, Singapore (Z.X.C.)

#Both authors contributed equally

\*Corresponding author:

Dr. Zhi Xiong Chen

Department of Physiology, Yong Loo Lin School of Medicine, National University of  
Singapore, MD9, 2 Medical Drive, S117597

Tel: (+65) 6516 3231 / Fax: (+65) 6778 8161 / Email: [zhixiong\\_chen@nus.edu.sg](mailto:zhixiong_chen@nus.edu.sg)

## Supplementary Figure Legends

**Figure S1: Overexpression of wild-type KIF1B $\beta$  and KIF1B $\beta$ 600-1400 has no effect on mitochondrial O<sub>2</sub><sup>-</sup> in NB1 cells.**

(A) Immunoblot analysis of NB1 cells transfected with empty vector pcDNA3 (Empty), wild-type KIF1B $\beta$  (FL) and KIF1B $\beta$ 600-1400 (600-1400). (B) Corresponding mitochondrial O<sub>2</sub><sup>-</sup> measurement conducted using MitoSOX Red assay after 24 hours of transfection.

**Figure S2: O<sub>2</sub><sup>-</sup> increases endogenous KIF1B $\beta$  protein expression.**

(A) Immunoblot analysis of CHP212 and (B) NB1 cells transfected with empty vector pcDNA3 (Empty), wild-type KIF1B $\beta$  (FL) or wild-type KIF1B $\beta$  treated with NAC for 48 hours (Cells were pre-incubated with NAC for 2 hours). Right – corresponding densitometry for FLAG-KIF1B $\beta$  expression. (C) Immunoblot analysis of endogenous KIF1B $\beta$  expression in SK-N-SH cells upon treatment with DPI or DDC alone for 4 hours, or in combination (pre-incubate DPI for 12 hours, followed by 4 hours treatment of DDC). Right – densitometry of KIF1B $\beta$  expression. (D) Corresponding intracellular O<sub>2</sub><sup>-</sup> measurement determined using lucigenin assay in SK-N-SH cells treated with DPI or DDC alone or in combination (mean  $\pm$  SD; n=3; \*, P<0.05; \*\*\*, P<0.001). (E) Intracellular O<sub>2</sub><sup>-</sup> measurement determined using lucigenin-based chemiluminescence assay after 4 hours of treating SK-N-SH cells with increasing doses of DDC.

**Figure S3: Dose- and time-dependent response of KIF1B $\beta$  expression upon treatment with Gliotoxin in neuroblastoma cell lines.**

(A) Immunoblot analysis of CHP212 and (B) SK-N-SH cells in response to increasing doses of Gliotoxin treatment for 24 hours. (C) Immunoblot analysis of CHP212 cells treated with 50 nM Gliotoxin and (D) SK-N-SH cells treated with 300 nM Gliotoxin over 72 hours. (E) Crystal violet staining to determine colony formation ability of CHP212 and (F) SK-N-SH cells that were treated with Gliotoxin for every 24 hours (50 nM) and 12 hours (300 nM) respectively, for several days. (G) Immunoblot analysis of endogenous KIF1B $\beta$  expression in CHP212 cells and (H) SK-N-SH cells treated with 50 nM or 300 nM Gliotoxin, respectively for 24 hours, or in combination with 10mM Tiron for 24 hours (Cells were pre-treated with 10 mM Tiron for 2 hours). Bottom – densitometry of KIF1B $\beta$  expression.

**Figure S4: Overexpression of EglN3 increases mitochondrial O<sub>2</sub><sup>-</sup> in SK-N-SH cells.**

(A) Immunoblot analysis of FLAG-EglN3 expression after 24 hours of transfection in SK-N-SH cells. (B) Corresponding total ROS measurement determined using DCFDA assay 24 hours post-transfection with 1  $\mu$ g or 2  $\mu$ g FLAG-EglN3 plasmids. (C) Corresponding mitochondrial O<sub>2</sub><sup>-</sup> measurement determined using MitoSOX Red assay after 24 hours of transfection with 1  $\mu$ g or 2  $\mu$ g FLAG-EglN3 (mean  $\pm$  SD; n=3; \*\*, P<0.01).

# Supplementary Figure 1

**A**

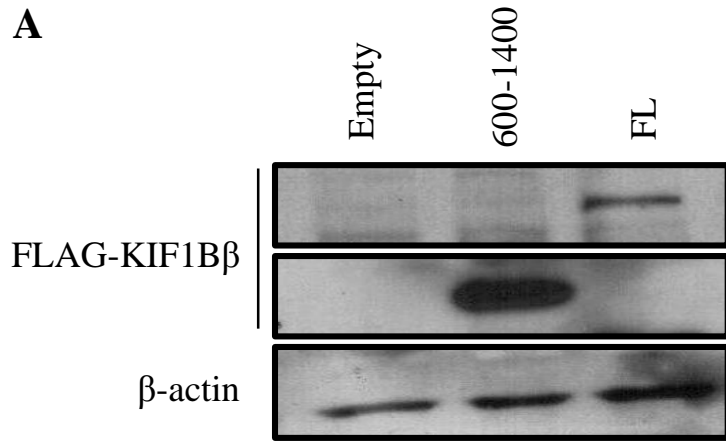

**B**

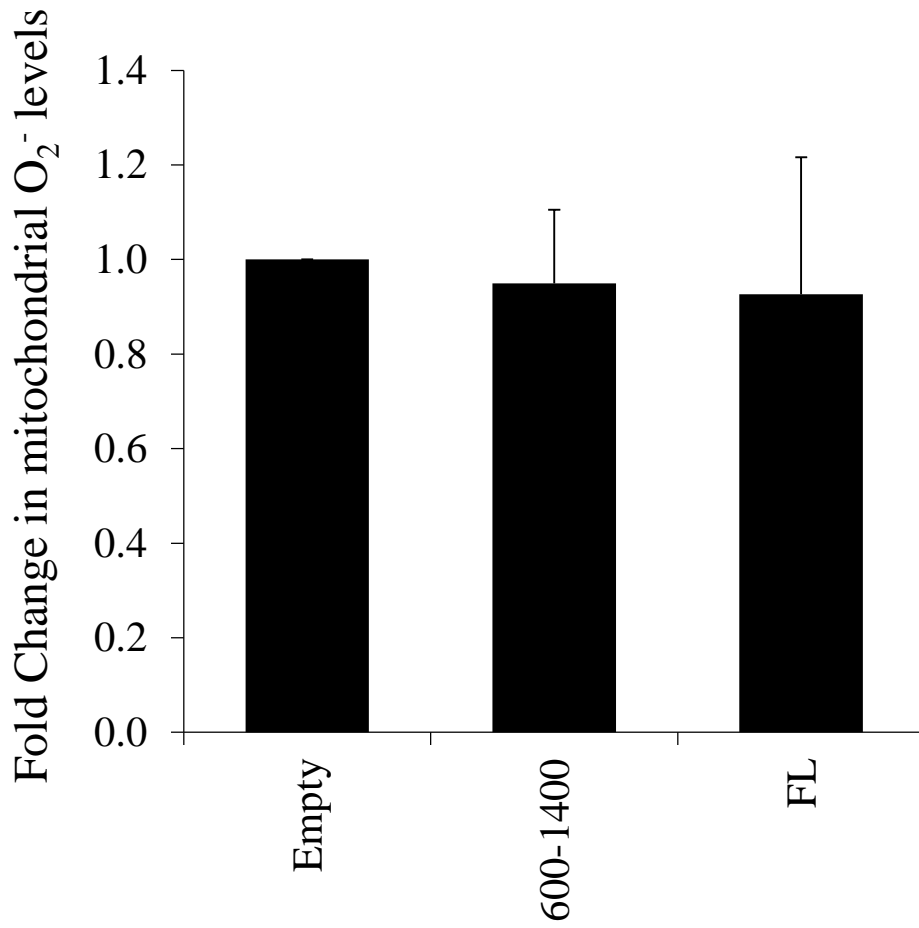

## Supplementary Figure 2

**A**

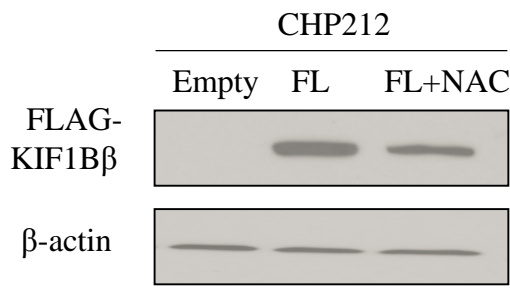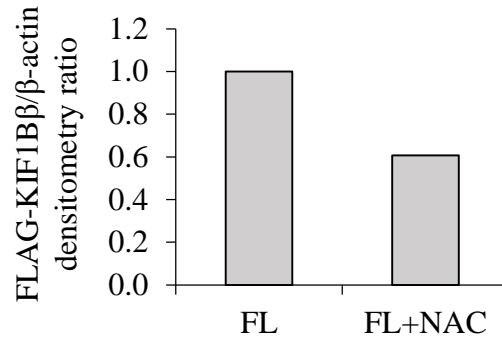

**B**

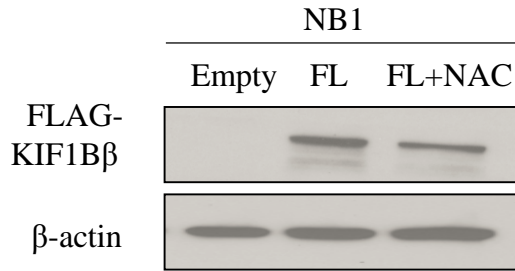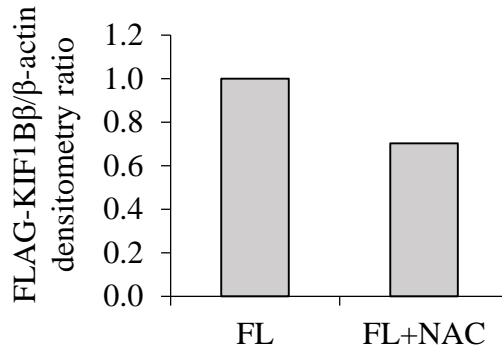

**C**

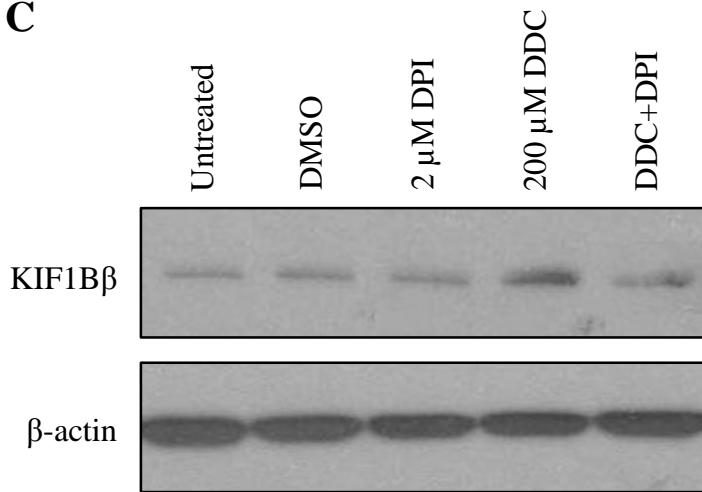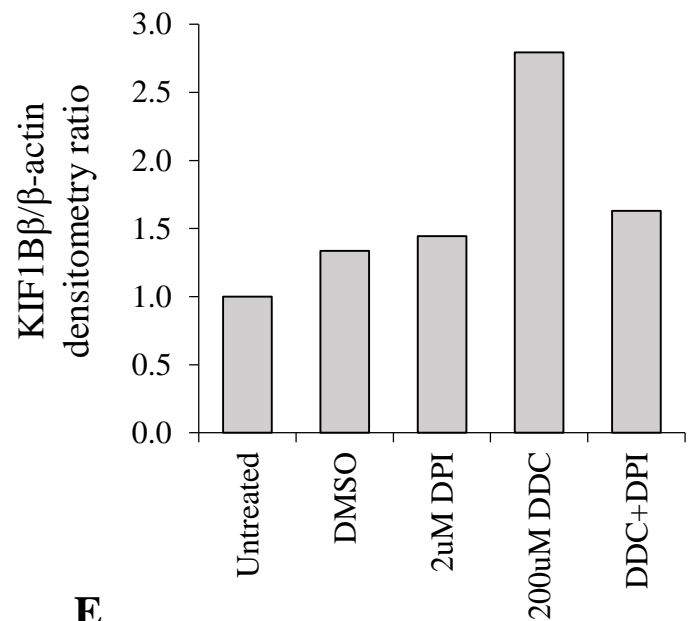

**D**

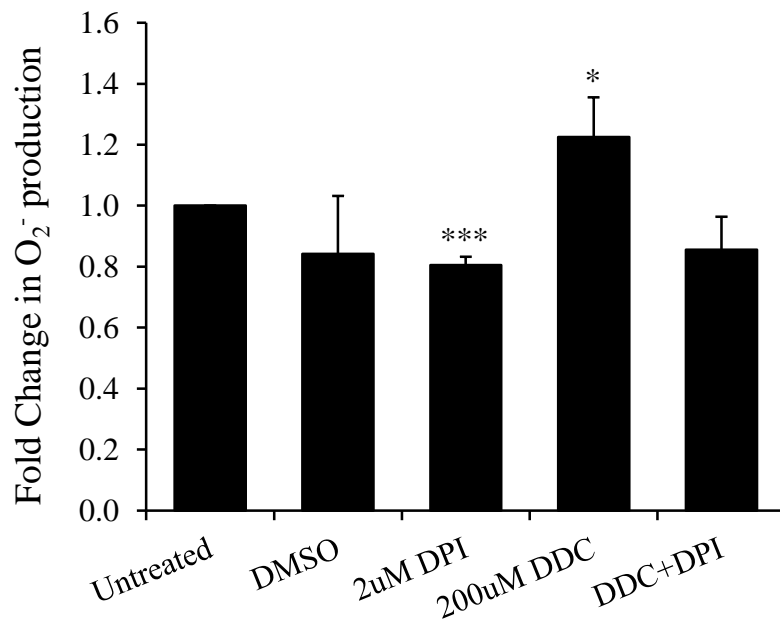

**E**

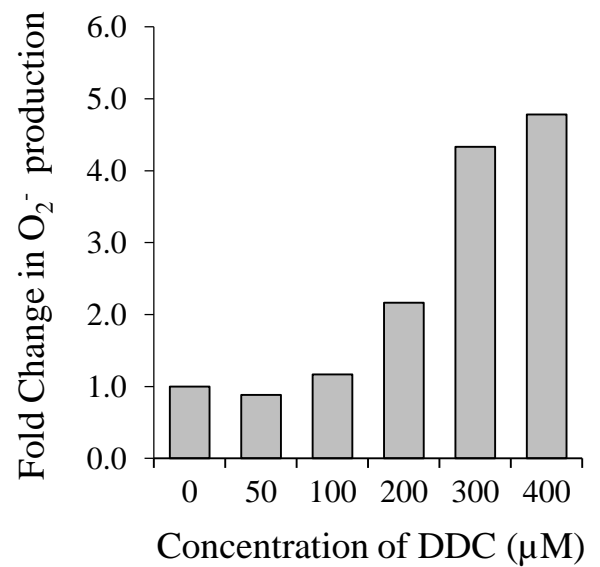

# Supplementary Figure 3

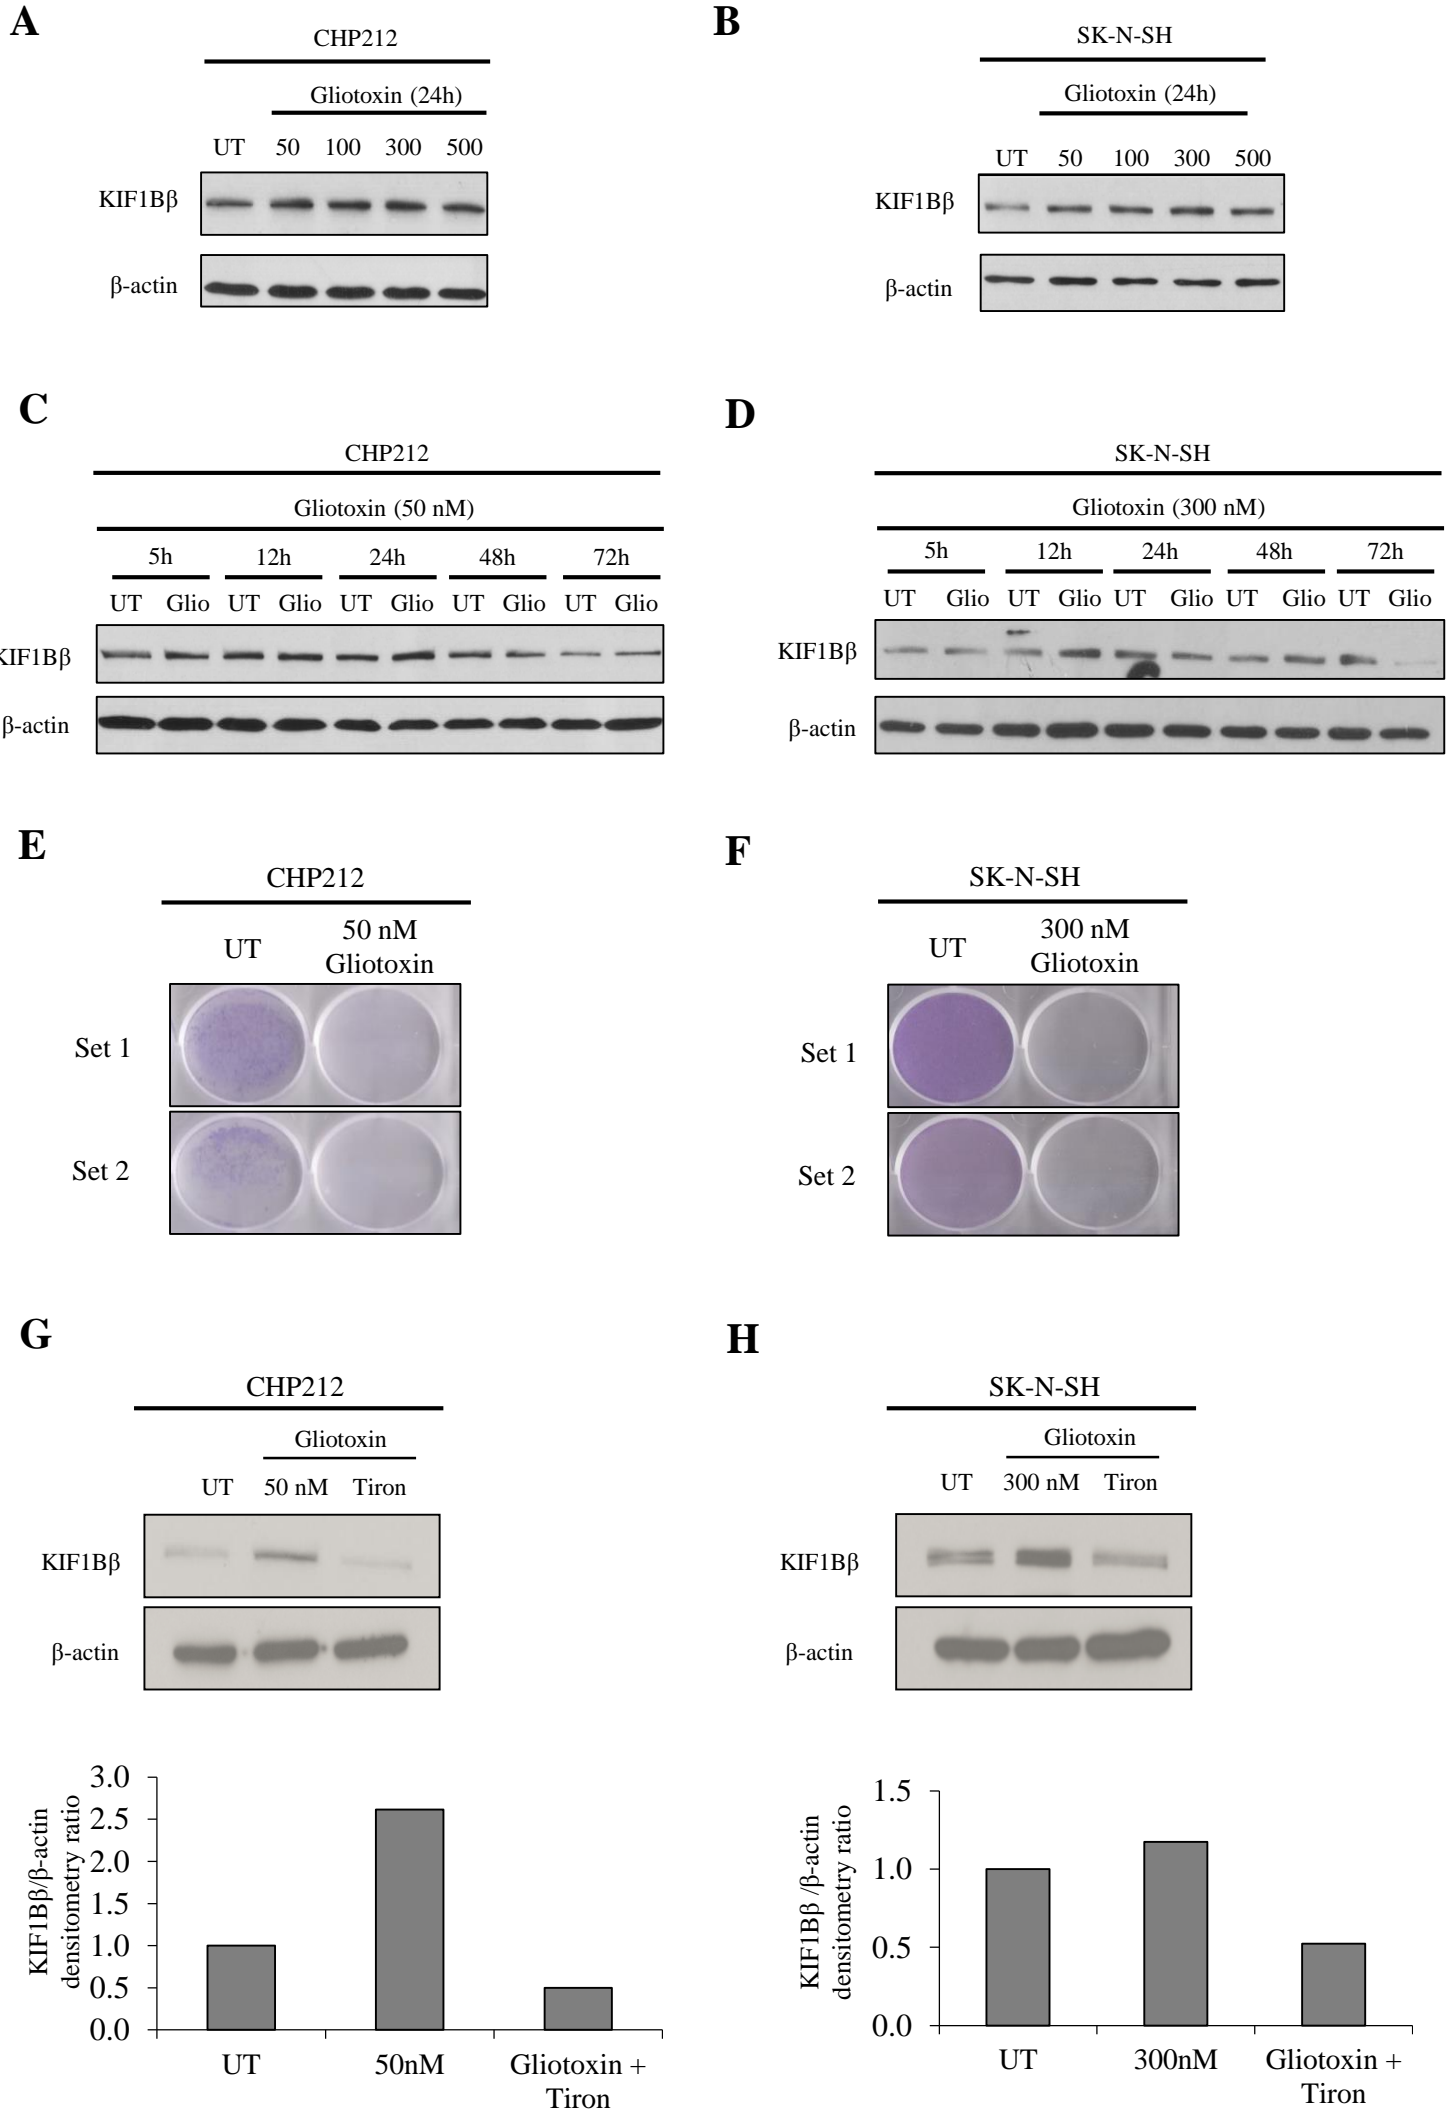

# Supplementary Figure 4

**A**

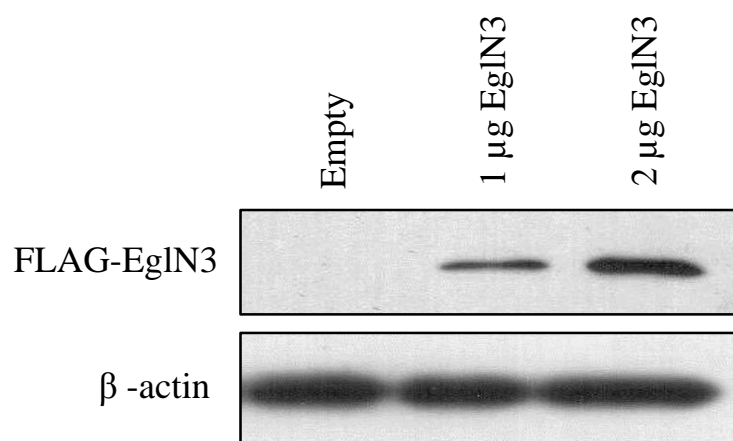

**B**

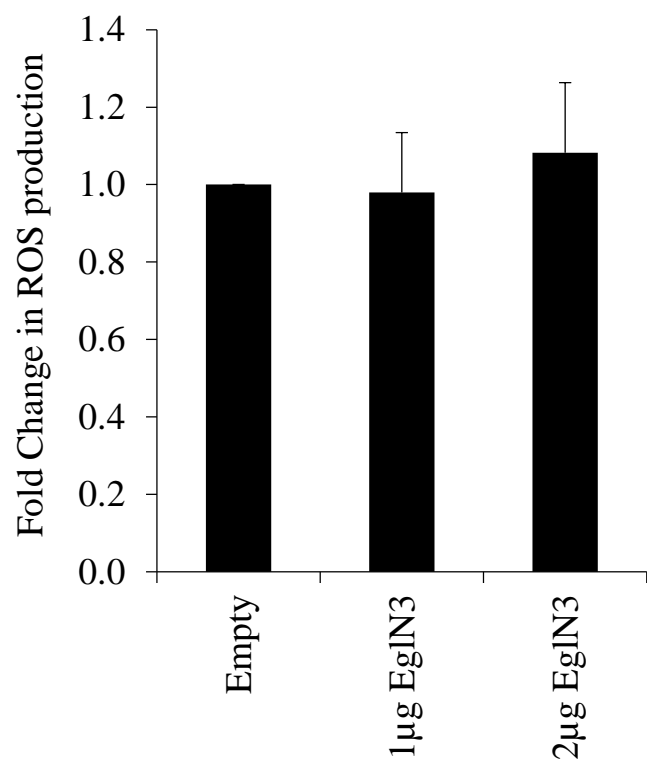

**C**

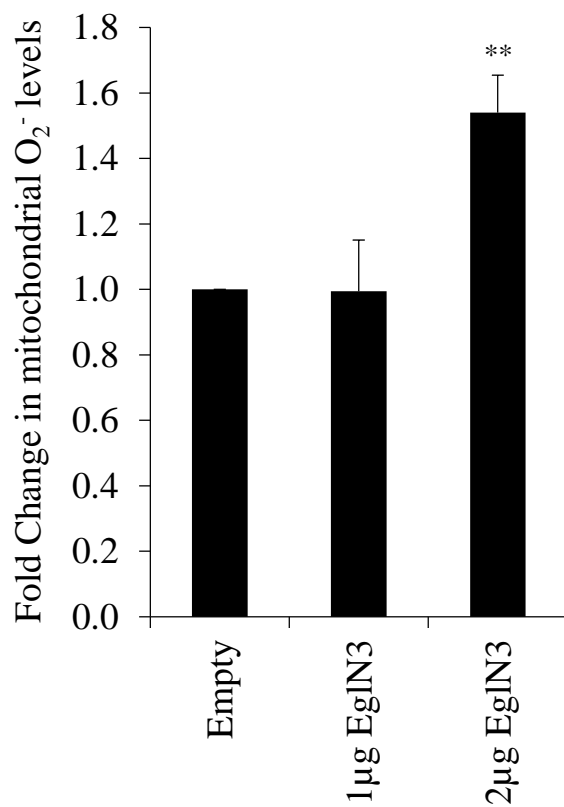

Supplement: 41598_2017_17192_MOESM1_ESM.pdf [file 41598_2017_17192_MOESM1_ESM.pdf]
